# Supplementary material
Source: Royal Society of Chemistry journal article supplement (doi:10.1039/d6nj01666a)
Supplement: d6nj01666a1.pdf [file d6nj01666a1.pdf]

## SUPPORTING INFORMATION

---

### Supporting Information

#### **Facile green synthesis of multifunctional nitrogen-doped carbon dots via sequential non-enzymatic browning reactions for Fe<sup>3+</sup> sensing and anti-counterfeiting ink**

Jiamin Li, <sup>a</sup> Yulu Liu, <sup>a</sup> Yuanyuan Lei, <sup>a</sup> Zehong Ji, <sup>a</sup> Yingzhi Shen, <sup>a</sup> Yuchi Chen, <sup>a</sup> Dongqing Cheng, <sup>a</sup> Wenxiao Jiang, <sup>b</sup> Xing Chen <sup>c</sup> and Guangming Li <sup>\*a</sup>

<sup>a</sup>. School of Medical Technology and Information Engineering, Zhejiang Chinese Medical University, Hangzhou, Zhejiang 310053, P. R. China. E-mail: guangmingli2020@163.com

<sup>b</sup>. Department of Nutrition and Food Hygiene, School of Public Health, Shenzhen University Medical School, Shenzhen University, Shenzhen 518055, P. R. China.

<sup>c</sup>. State Key Laboratory of Food Science and Resources, College of Food Science & Technology, Nanchang University, Nanchang, Jiangxi 330047, P. R. China.

\* Contact information:

Guangming Li (GML), Tel: +86 15948350475; Fax: N/A; Address: School of Medical Technology and Information Engineering, Zhejiang Chinese Medical University, Hangzhou, Zhejiang 310053, China  
E-mail: guangmingli2020@163.com

## Supporting Figures

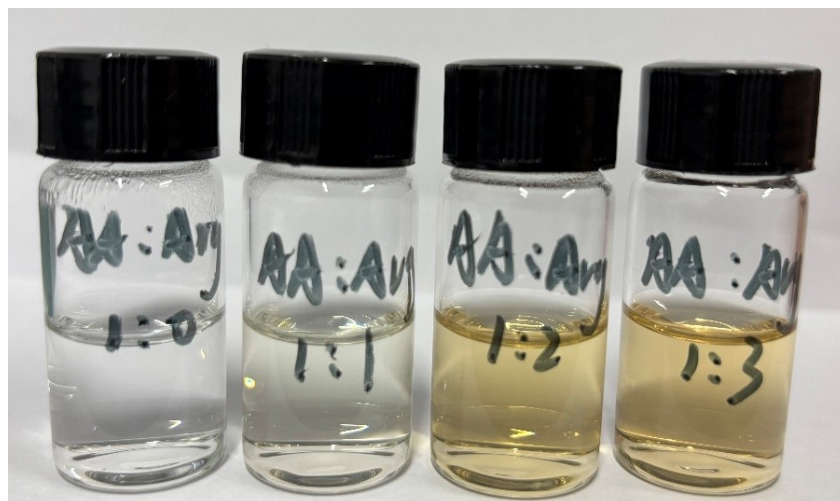

Fig. S1. Photographs of the reaction solutions with different ascorbic acid-to-arginine molar ratios (1:0, 1:1, 1:2, and 1:3) after heating at 60 °C for 5 h. The corresponding pH values were 3–4, 5–6, 9, and 11, respectively. Pronounced browning was observed only at ratios of 1:2 and 1:3 under alkaline conditions (pH 9 and 11).

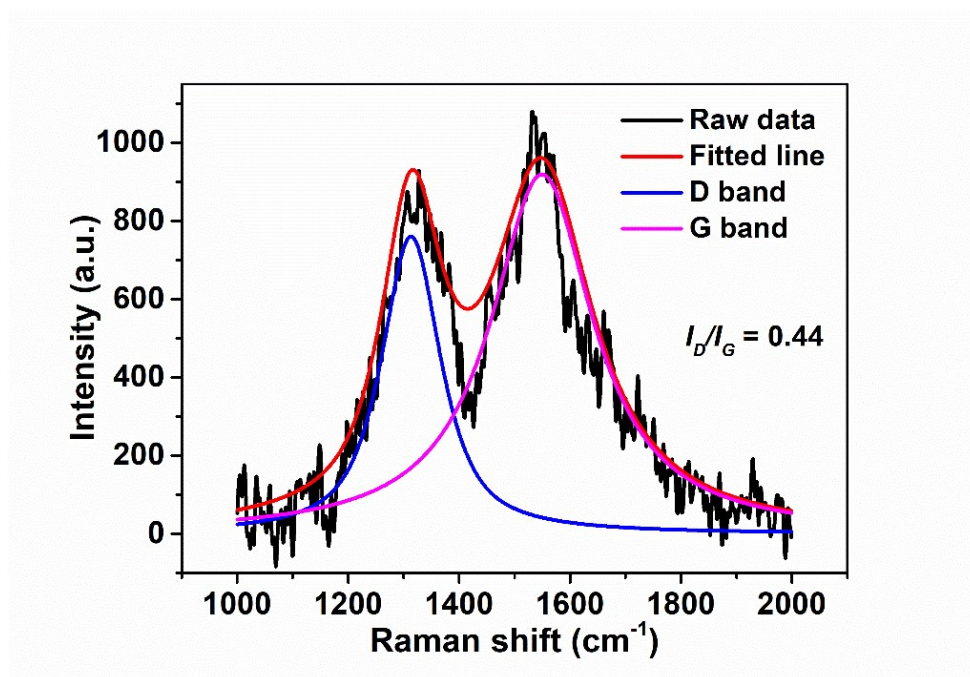

Fig. S2. Raman spectrum of N-CDs. The result shows the D band at 1313.6  $\text{cm}^{-1}$  and the G band at 1549.4  $\text{cm}^{-1}$ . The  $I_D/I_G$  area ratio was calculated to be 0.44, indicating the existence of  $\text{sp}^2$ -hybridized carbon clusters in the N-CDs.

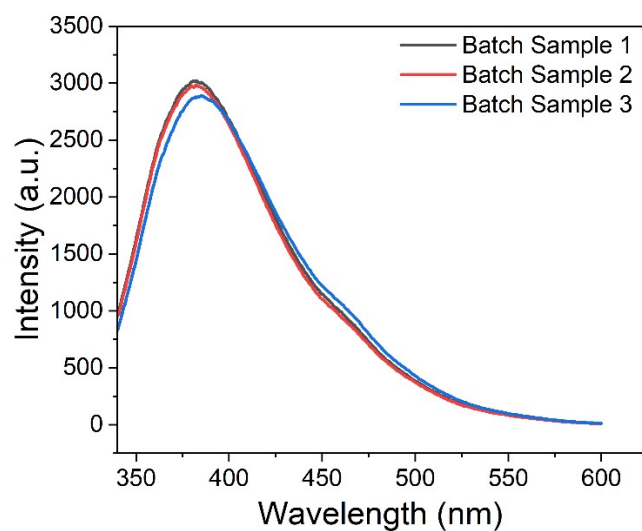

Fig. S3. Fluorescence emission spectra of three independent batches of N-CDs under 320 nm excitation, demonstrating good batch-to-batch reproducibility.

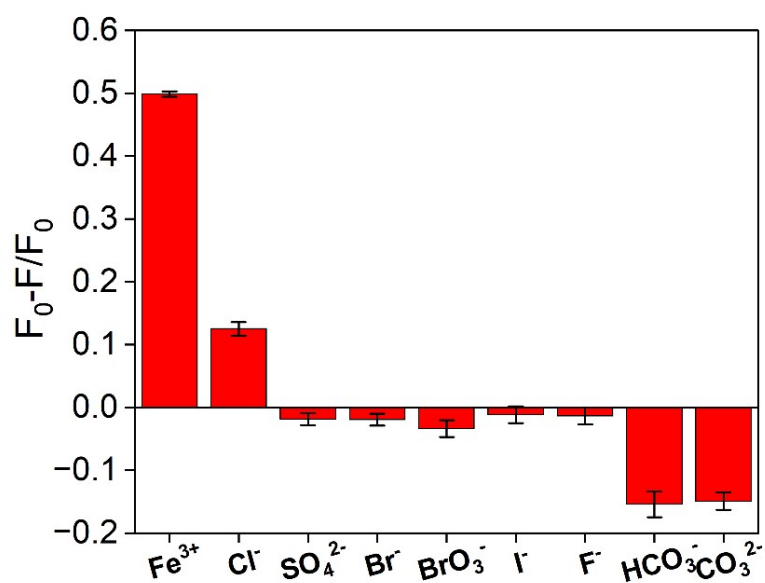

Fig. S4. Fluorescence quenching efficiency of various anions (200 μM). Unlike  $Fe^{3+}$ , no significant quenching was observed for the tested anions.

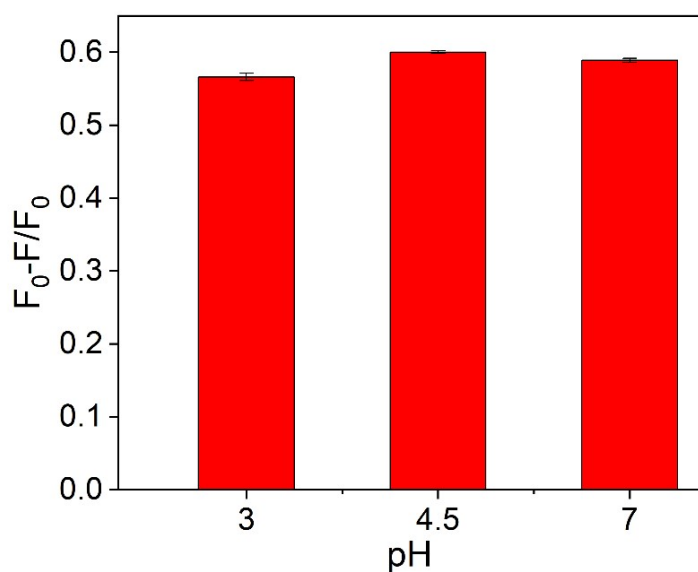

Fig. S5. Effect of initial pH on the  $\text{Fe}^{3+}$ -induced fluorescence quenching of N-CDs. The quenching efficiency was measured at initial pH 3, 4.5, and 7 after the addition of the same concentration of  $\text{Fe}^{3+}$ . The quenching efficiency remained almost unchanged across different pH conditions.

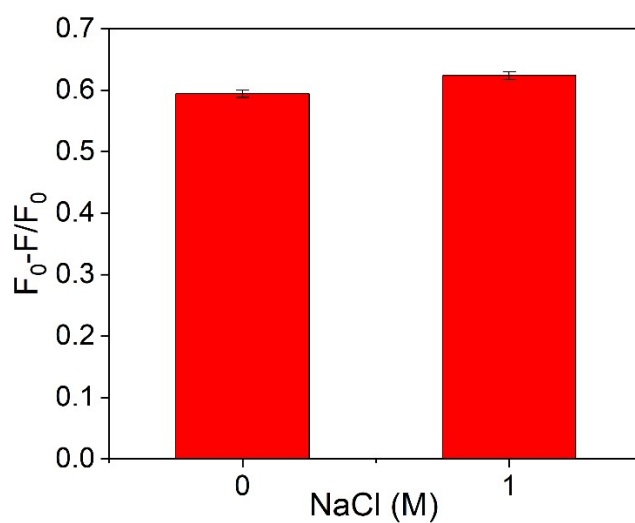

Fig. S6. Effect of ionic strength on the  $\text{Fe}^{3+}$ -induced fluorescence quenching of N-CDs. The quenching efficiency was evaluated under both original and high-ionic-strength (1 M NaCl) conditions. The quenching efficiency remained almost unchanged under different ionic strength conditions.

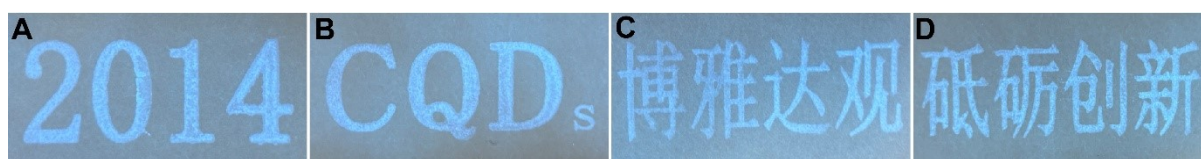

Fig. S7. Fluorescence photographs of the patterns printed with N-CDs-based ink after being stored under ambient conditions for more than six months. The patterns remained bright and sharp with well-defined edges, and no observable fading, bleeding, or loss of fine details was detected, demonstrating the excellent long-term stability of the N-CDs-based ink for anti-counterfeiting applications.

Table S1. Raman spectral parameters of N-CDs: peak, center, areas, intensities, and full width at half maximum (FWHM) of the D and G bands. The  $I_D/I_G$  area ratio was calculated to be 0.44.

| Peak   | Type           | Center (cm <sup>-1</sup> ) | Area     | Intensity | FWHM (cm <sup>-1</sup> ) |
|--------|----------------|----------------------------|----------|-----------|--------------------------|
| D band | Gauss+Lor Area | 1313.6                     | 142867.6 | 760.4     | 127.7                    |
| G band | Gauss+Lor Area | 1549.4                     | 322912.1 | 919.1     | 223.7                    |

Table S2. Elemental composition of N-CDs.

| Element  | C     | N     | H    | O     |
|----------|-------|-------|------|-------|
| Mass (%) | 42.39 | 24.33 | 6.98 | 26.30 |

Table S3: Quenching efficiency comparison of various batches upon addition of Fe<sup>3+</sup> at 200 μM.

| Batch | Fe <sup>3+</sup> (μM) | F <sub>0</sub> -F/F <sub>0</sub> | SD   |
|-------|-----------------------|----------------------------------|------|
| 1     | 200                   | 0.50                             |      |
| 2     | 200                   | 0.59                             | 0.05 |
| 3     | 200                   | 0.60                             |      |

## SUPPORTING INFORMATION

**Table S4 Comparison of analytical performance for Fe<sup>3+</sup> ion detection between our N-CDs and representative non-CDs-based sensors.**

| Sensors                     | LOD ( $\mu\text{M}$ ) | Linear Range ( $\mu\text{M}$ ) | Analysis time   | References       |
|-----------------------------|-----------------------|--------------------------------|-----------------|------------------|
| Eu-MOF                      | 2.65                  | NA                             | NA              | 1                |
| MWCNT-modified GCE          | 6.0                   | 10–100 $\mu\text{M}$           | NA              | 2                |
| SiNPs                       | 0.56                  | 2.0–50                         | 15 min          | 3                |
| Polyherbal AgNPs (PH-AgNPs) | 7.9                   | 9–54                           | 1 h             | 4                |
| Tb-MOF (microporous)        | 4.84                  | NA                             | >30 min         | 5                |
| tKeima fluorescent protein  | 428.6                 | Up to ~1500                    | 5 min           | 6                |
| <b>N-CDs</b>                | <b>2.2</b>            | <b>10–200</b>                  | <b>&lt;30 s</b> | <b>This work</b> |

### References

1. Jiao, S., Y. Zhai, H. Zhang, & P. Li. *Polyhedron*, 2025, **281**, 117751.
2. Venegas, C. J., Tamayo, F., Cabrera-Reina, A., Sierra-Rosales, P., & Miralles-Cuevas, S. *Chem. Eng. J. Adv.*, 2026, **26**, 101067.
3. Ye, H. L., Shang, Y., Wang, H. Y., Ma, Y. L., He, X. W., Li, W. Y., Li, Y. H., & Zhang, Y. K. *Talanta*, 2021, **230**, 122294.
4. Vyavahare, A., Shah, P. D., Mishra, V., Patel, A. S., Raina, V., & Jana, S. S. *RSC Adv.*, 2026, **16**, 3976-3994.
5. Zhang, X. F., Feng, L. H., Ma, S. Y., Xia, T. F., Jiao, F. F., Kong, Z., & Duan, X. *J. Solid State Chem.*, 2022, **312**, 123232.
6. Seo, Y. G., Han, D. G., & Kim, I. J. *Biosensors*, 2026, **16**, 178.
